# Supplementary material for: Size- and facet-dependent photoelectrochemical properties of Cu2O crystals
Source: Royal Society of Chemistry journal article supplement (doi:10.1039/d3tc00673e), 2023-01-01
Supplement: d3tc00673e1.pdf [file d3tc00673e1.pdf]

Electronic Supplementary Information

**Size- and facet-dependent photoelectrochemical properties of Cu<sub>2</sub>O crystals**

Hsueh-Heng Ma and Michael H. Huang\*

*Department of Chemistry and Frontier Research Center on Fundamental and Applied Sciences of Matters, National Tsing Hua University, Hsinchu 300044, Taiwan*

**Synthesis of size-tunable Cu<sub>2</sub>O cubes**

To make size-tunable Cu<sub>2</sub>O cubes, SDS powder was first dissolved in deionized water, and the solution was sonicated for 10 min. CuCl<sub>2</sub> solution was then injected under stirring in a water bath set at 31 °C. After stirring for 25 min, NaOH solution was introduced. Subsequently, after stirring for 0 sec (immediately), 10 sec, and 20 sec, NH<sub>2</sub>OH·HCl solution was injected to make *S*-cubes, *M*-cubes, and *L*-cubes, respectively. The mixture was stirred for 20 sec and aged for 50 min to obtain the particles. The precipitate was collected by centrifugation at 6500 rpm and washed with water by repeated centrifugation at 9000 rpm for three times to remove the SDS surfactant. Finally, the particles were preserved in 99% ethanol. The exact reagent concentrations and volumes used are listed in Table S1.

**Table S1** Reagent concentrations and volumes used to make various Cu<sub>2</sub>O crystals.

|       | SDS<br>(g) | DI water<br>(mL) | 0.1 M CuCl <sub>2</sub><br>(mL) | 1 M NaOH<br>(mL) | 0.2 M NH <sub>2</sub> OH · HCl<br>(mL) |
|-------|------------|------------------|---------------------------------|------------------|----------------------------------------|
| Cubes | 0.348      | 38.2             | 0.4                             | 0.8              | 0.6                                    |
| CO    | 0.348      | 37.4             | 0.4                             | 0.8              | 1.4                                    |
| Oct   | 0.348      | 26.6             | 0.8                             | 0.8              | 2.6                                    |
| RD    | 0.348      | 27.68            | 2                               | 0.72             | 0.1 M NH <sub>2</sub> OH · HCl<br>(mL) |
|       |            |                  |                                 |                  | 9.6                                    |

**Synthesis of Cu<sub>2</sub>O octahedra and rhombic dodecahedra**

The synthesis procedure for Cu<sub>2</sub>O octahedra and rhombic dodecahedra is slightly different from that of cubes. The SDS solution was stirred for 5 min in a 31 °C water bath. Then CuCl<sub>2</sub> solution was injected under stirring. After stirring for 10 min and 25 min respectively for octahedra and rhombic dodecahedra, NaOH solution was introduced. After stirring for 4 sec, NH<sub>2</sub>OH·HCl solution was injected. For octahedra, the mixture was stirred for 10 sec and aged for 25 min. For rhombic dodecahedra, the mixture was stirred for 20 sec and aged for 50 min. The precipitate was collected by centrifugation at 6500 rpm and washed with water by centrifugation at 9000 rpm for three times. Finally, the particles were preserved in 99% ethanol.

## Synthesis of Cu<sub>2</sub>O cuboctahedra

The synthesis process for Cu<sub>2</sub>O cuboctahedra is similar to that of Cu<sub>2</sub>O cubes. The SDS solution was sonicated for 10 min. Next, CuCl<sub>2</sub> solution was injected under stirring in a 31 °C water bath. After stirring for 25 min, NaOH solution was introduced. After stirring for 15 sec, NH<sub>2</sub>OH·HCl solution was injected. The mixture was stirred for 20 sec and aged for 50 min. The precipitate was collected by centrifugation at 6500 rpm and washed with water by centrifugation at 9000 rpm for three times. Finally, the particles were preserved in 99% ethanol.

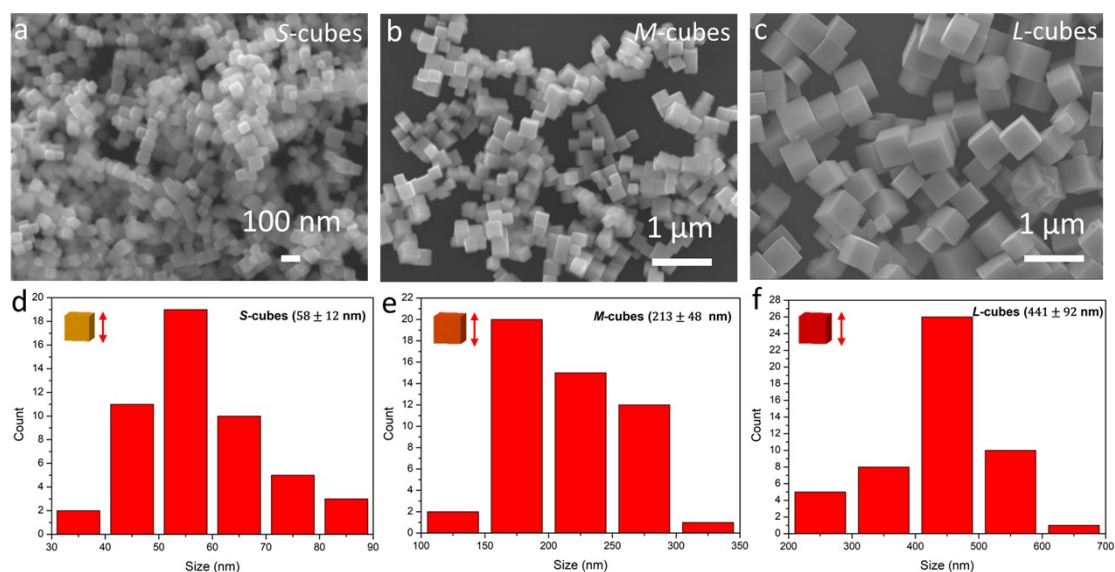

**Fig. S1** (a–c) SEM images of the synthesized Cu<sub>2</sub>O cubes with different sizes. (d–f) Size distribution histograms of the Cu<sub>2</sub>O cubes.

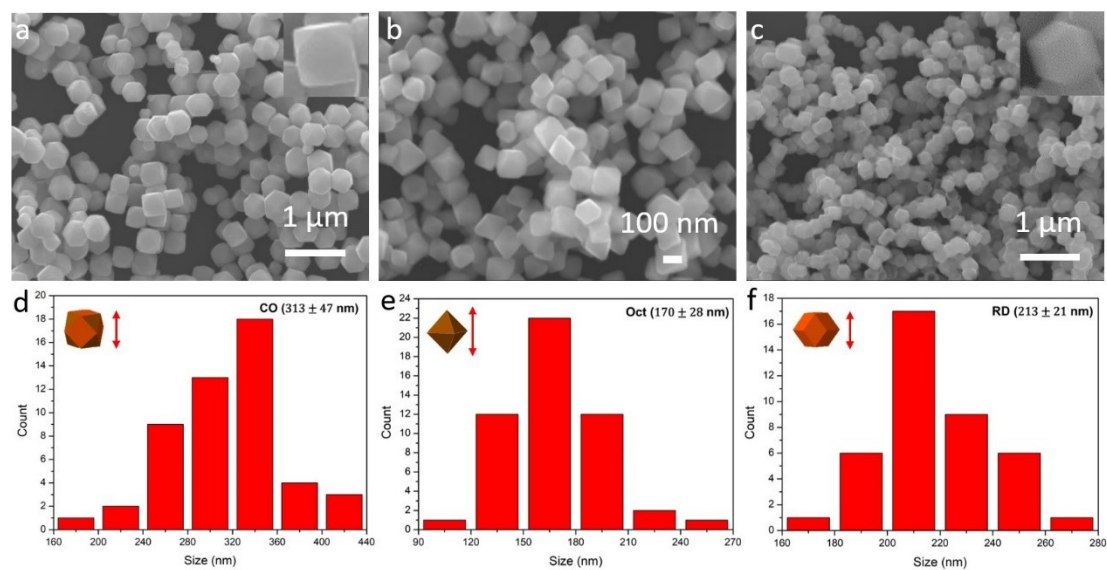

**Fig. S2** SEM images of the synthesized Cu<sub>2</sub>O (a) cuboctahedra, (b) octahedra, and (c) rhombic dodecahedra and (d–f) their size distribution histograms.

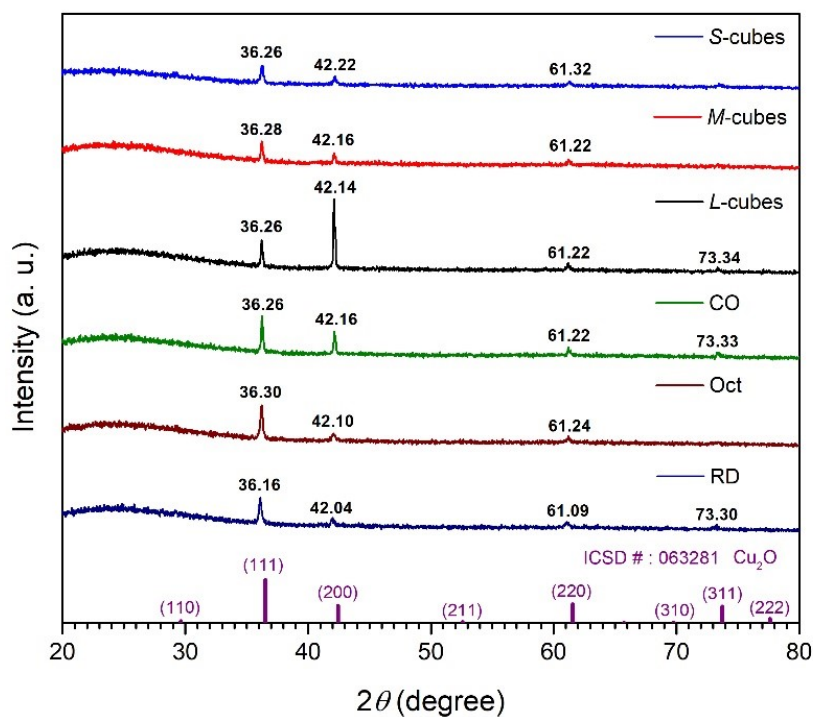

Fig. S3 XRD patterns of different Cu<sub>2</sub>O crystals.

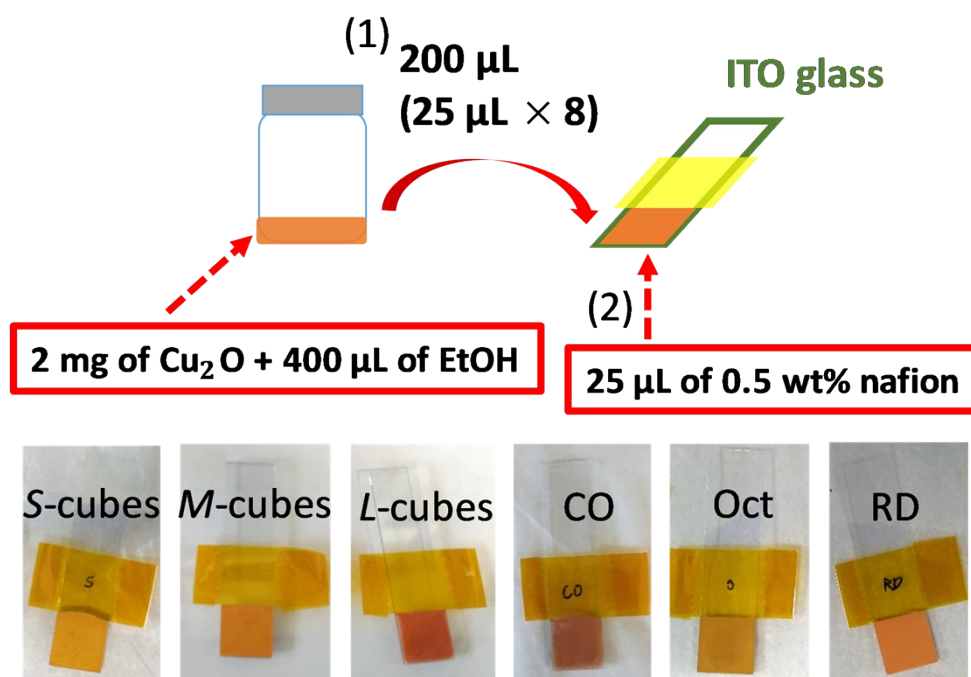

Fig. S4 Illustration of the process to make Cu<sub>2</sub>O/ITO photocathodes and photographs of the prepared photocathodes using different Cu<sub>2</sub>O crystals.

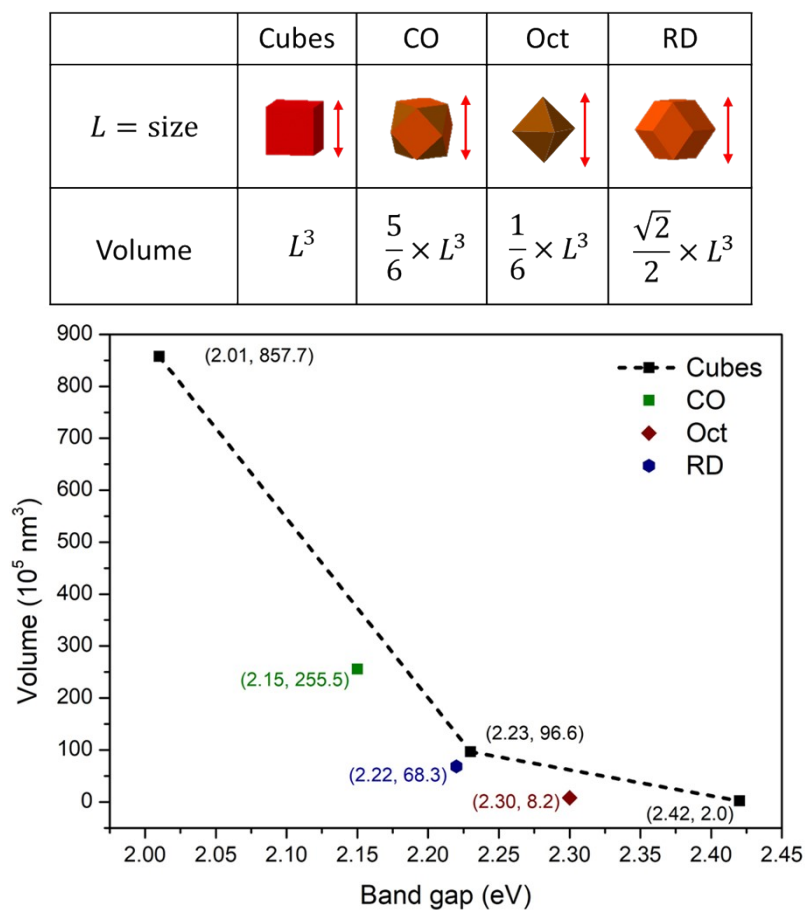

**Fig. S5** Determination of the particle volumes and a plot of the particle sizes and their band gaps.

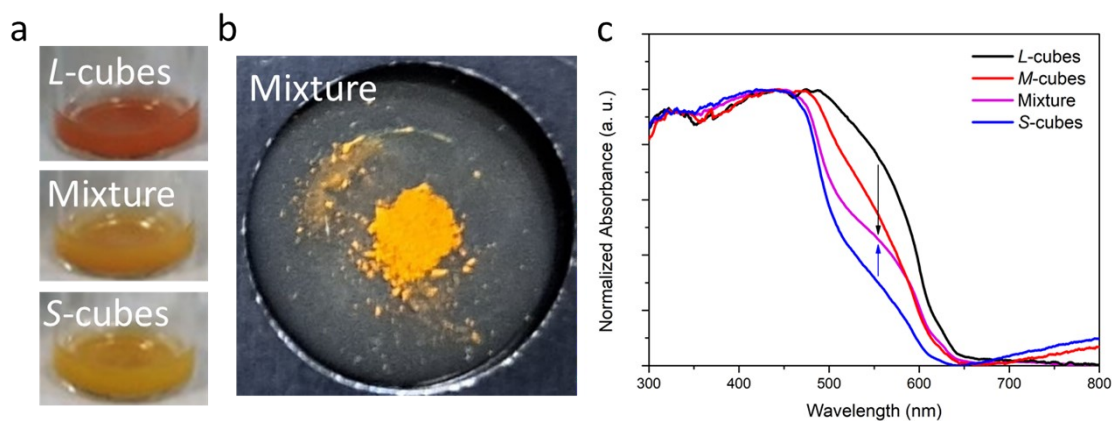

**Fig. S6** Photographs of (a)  $\text{Cu}_2\text{O}$  cube dispersions and (b) the mixed powder with large and small cubes. (c) Diffuse reflectance spectra of  $\text{Cu}_2\text{O}$  cubes.

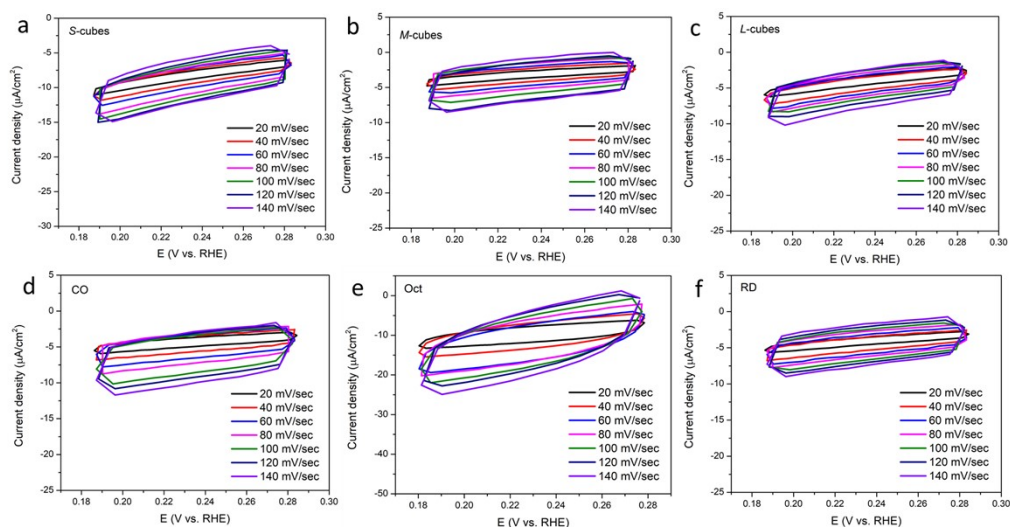

**Fig. S7** CV curves for electrochemically active surface area determination.

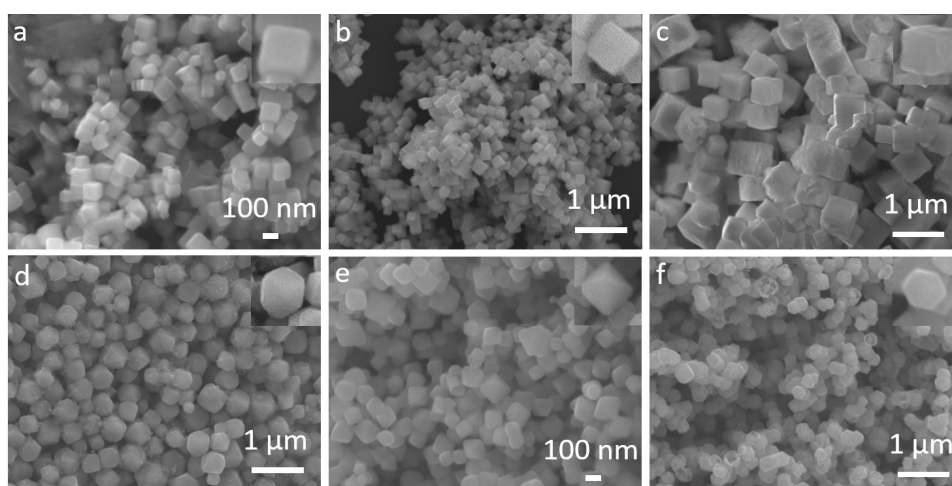

**Fig. S8** SEM images of Cu<sub>2</sub>O (a) small cubes, (b) medium cubes, (c) large cubes, (d) cuboctahedra, (e) octahedra, and (f) rhombic dodecahedra after photoelectrochemical measurements.

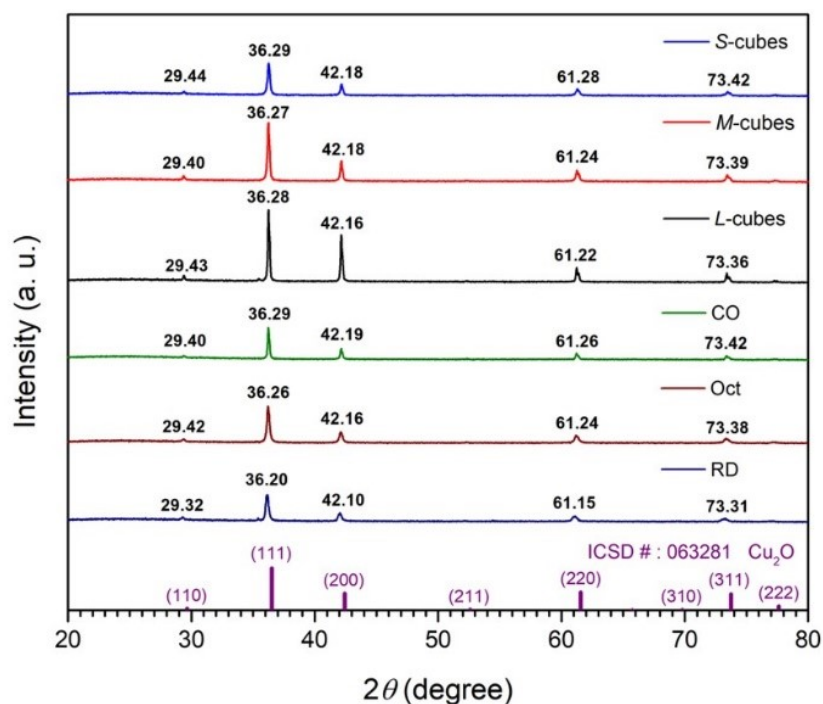

**Fig. S9** XRD patterns of  $\text{Cu}_2\text{O}$  crystals after the photoelectrochemical measurements.

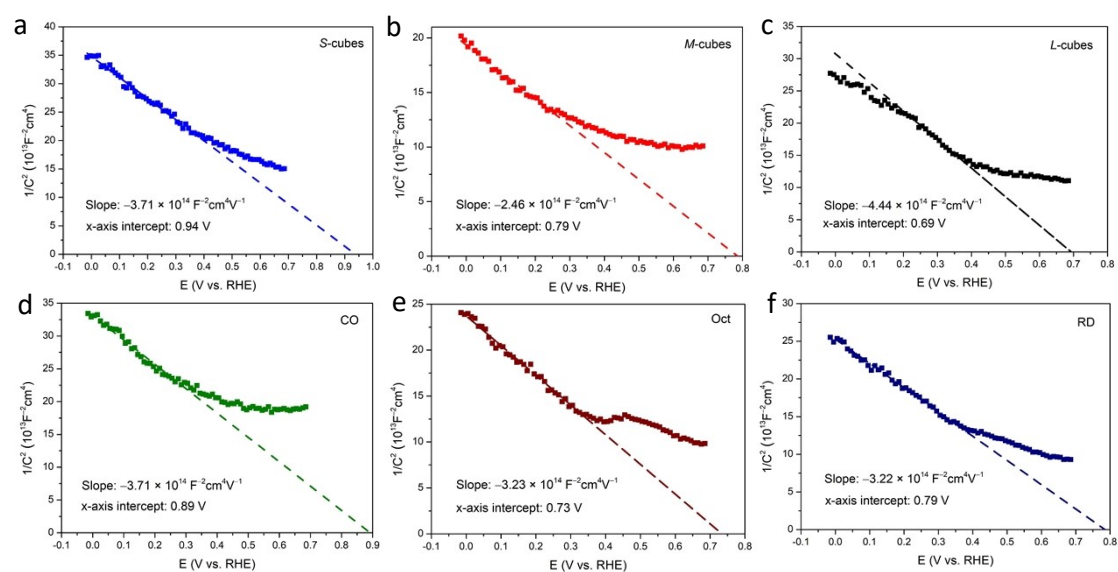

**Fig. S10** Mott–Schottky plots of  $\text{Cu}_2\text{O}$  (a) small cubes, (b) medium cubes, (c) large cubes, (d) cuboctahedra, (e) octahedra, and (f) rhombic dodecahedra. The slope and x-axis intercept of each line are provided.



**Table S2** Calculations for the determination of conduction band and valence band energies.

| Equations                                             | Parameters                                                     | S-cubes                               | M-cubes | L-cubes | CO    | Oct   | RD    |
|-------------------------------------------------------|----------------------------------------------------------------|---------------------------------------|---------|---------|-------|-------|-------|
| $E_{fb} = E_0 + \frac{k_B T}{e}$                      | $E_0$ (V vs. RHE)                                              | 0.94                                  | 0.79    | 0.69    | 0.89  | 0.73  | 0.79  |
|                                                       | $E_{fb}$ (V vs. RHE) $\oplus$                                  | 0.96                                  | 0.81    | 0.72    | 0.92  | 0.76  | 0.81  |
| $N_A = \frac{-2}{slope \times e \epsilon \epsilon_0}$ | Slope ( $10^{14} \text{ F}^{-2} \text{ cm}^4 \text{ V}^{-1}$ ) | -3.71                                 | -2.46   | -4.44   | -3.71 | -3.23 | -3.22 |
|                                                       | $N_A$ ( $10^{16} \text{ cm}^{-3}$ )                            | 5.01                                  | 7.54    | 4.19    | 5.01  | 5.75  | 5.77  |
| $E_V = E_{fb} + \frac{k_B T}{e} \ln \frac{N_V}{N_A}$  | $N_V = \frac{2(2\pi m \times k_B T)^{3/2}}{h^3}$               | $1.11 \times 10^{19} \text{ cm}^{-3}$ |         |         |       |       |       |
|                                                       | $E_V$ (V vs. RHE) $\oplus$                                     | 1.10                                  | 0.94    | 0.86    | 1.06  | 0.89  | 0.95  |
| $E_C = E_V + E_g$                                     | $E_g$ (eV) $\oplus$                                            | 2.42                                  | 2.23    | 2.01    | 2.15  | 2.30  | 2.22  |
|                                                       | $E_C$ (V vs. RHE) $\oplus$                                     | -1.32                                 | -1.31   | -1.15   | -1.09 | -1.41 | -1.27 |

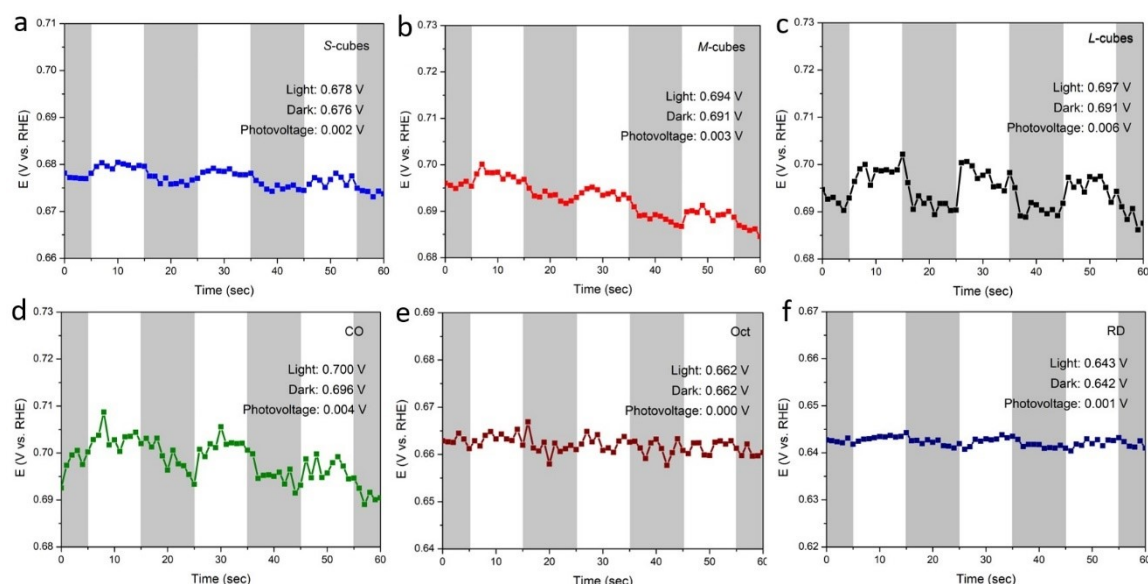

**Fig. S11** Chopped-light open-circuit potential measurements of Cu<sub>2</sub>O (a) small cubes, (b) medium cubes, (c) large cubes, (d) cuboctahedra, (e) octahedra, and (f) rhombic dodecahedra. Standard deviation of small cubes, medium cubes, and rhombic dodecahedra is 0.001 V. Standard deviation of large cubes and octahedra is 0.002 V. Standard deviation of cuboctahedra is 0.003 V.

**Table S3** Photovoltages and built-in potentials of different Cu<sub>2</sub>O crystals.

| Equations                                    | Parameters                           | S-cubes | M-cubes | L-cubes | CO    | Oct   | RD    |
|----------------------------------------------|--------------------------------------|---------|---------|---------|-------|-------|-------|
| $E_{ph,OC} = E_{OC}^{light} - E_{OC}^{dark}$ | $E_{OC}^{light}$ (V vs. RHE)         | 0.678   | 0.694   | 0.697   | 0.700 | 0.662 | 0.643 |
|                                              | $E_{OC}^{dark}$ (V vs. RHE) $\oplus$ | 0.676   | 0.691   | 0.691   | 0.696 | 0.662 | 0.642 |
|                                              | $E_{ph,OC}$ (V)                      | 0.002   | 0.003   | 0.006   | 0.004 | -     | 0.001 |
| $E_{bi} = E_{fb} - E_{OC}^{dark}$            | $E_{fb}$ (V vs. RHE)                 | 0.96    | 0.81    | 0.72    | 0.92  | 0.76  | 0.81  |
|                                              | $E_{bi}$ (V) $\oplus$                | 0.28    | 0.12    | 0.03    | 0.22  | 0.10  | 0.17  |

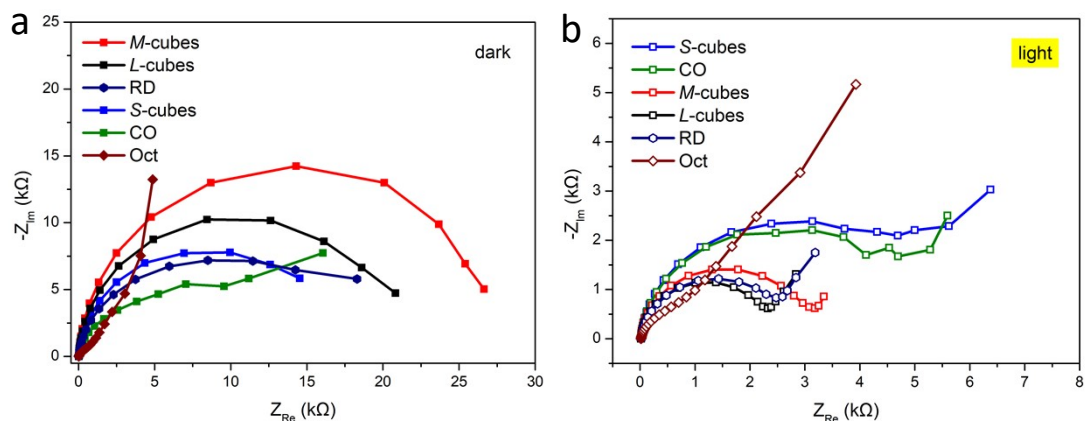

**Fig. S12** Nyquist plots from EIS measurements of  $\text{Cu}_2\text{O}$  crystals (a) in the dark and (b) under back-side illumination.

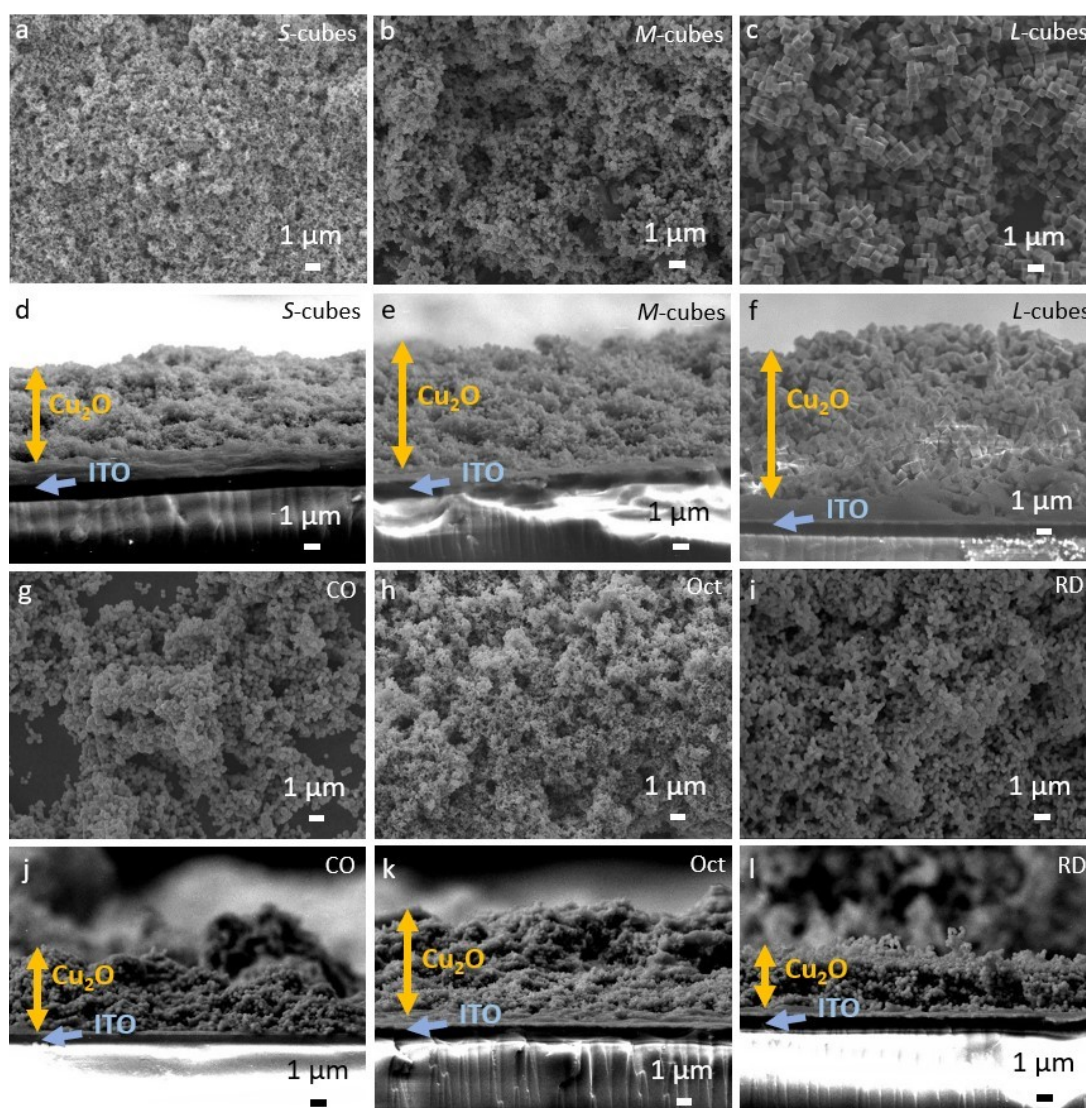

**Fig. S13** SEM images of (a–c, g–i) the top views and (d–f, j–l) cross-sectional views of  $\text{Cu}_2\text{O}/\text{ITO}$  photocathodes.



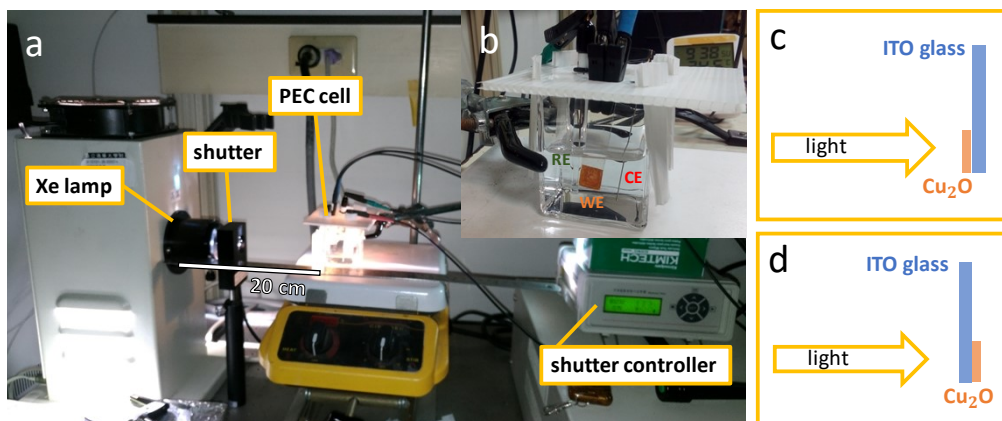

**Fig. S14** (a) Setup for the photoelectrochemical experiments. (b) Photograph of the reaction cell. (c, d) Drawings of the (c) front-side and (d) back-side light illumination directions.
